# Supplementary material for: Hydration and dynamics of l-glutamate ion in aqueous solution
Source: Royal Society of Chemistry journal article supplement (doi:10.1039/d0cp05489e), 2020-12-15
Supplement: d0cp05489e1.pdf [file d0cp05489e1.pdf]

## Electronic Supplementary Information

### Hydration and dynamics of glutamate ion in aqueous solution

Sergej Friesen,<sup>a</sup> Marina V. Fedotova,<sup>\*b</sup> Sergey E. Kruchinin,<sup>b</sup> and Richard Buchner<sup>\*a</sup>

---

<sup>a</sup>*Institute of Physical and Theoretical Chemistry, University of Regensburg, 93040 Regensburg, Germany. E-mail: richard.buchner@chemie.uni-regensburg.de*

<sup>b</sup>*G.A. Krestov Institute of Solution Chemistry, Russian Academy of Sciences, Akademicheskaya st. 1, 153045 Ivanovo, Russian Federation. E-mail: hebrus@mail.ru*

## S1 RISM input

Table S1: Dihedral angles for glutamate ion from the literature and values of this work from structure optimization with GAUSSIAN 09.<sup>1</sup>

| $C\alpha-C\beta-C\gamma-C2$         | $N-C\alpha-C\beta-C\gamma$  | $C1-C\alpha-C\beta-C\gamma$   | source    |
|-------------------------------------|-----------------------------|-------------------------------|-----------|
| $0^\circ$ to $100^\circ$            | $180^\circ$ to $-100^\circ$ | $0^\circ$ to $100^\circ$      | 2         |
| $\sim 60^\circ, -70^\circ$ (1.57 M) | $-160^\circ, -90^\circ$     | $(90 \pm 30)^\circ, 50^\circ$ | 3         |
| $65.4^\circ$                        | $-174.2^\circ$              | $68.9^\circ$                  | this work |

Table S2: Atom coordinates,  $x$ ,  $y$  and  $z$ , van der Waals parameters,  $\sigma$  and  $\epsilon$ , and partial charges,  $q$  (as fraction of the elementary charge,  $e_0$ ), for the glutamate anion. For atom labelling see Fig. 1 of the Main Article.

| Atom | $x / \text{nm}$ | $y / \text{nm}$ | $z / \text{nm}$ | $\sigma / \text{nm}$ | $\epsilon / \text{kcal mol}^{-1}$ | $q / e_0$ |
|------|-----------------|-----------------|-----------------|----------------------|-----------------------------------|-----------|
| O21  | 0.214           | 0.102           | -0.086          | 0.296                | 0.210                             | -0.862    |
| C2   | 0.227           | 0.003           | -0.010          | 0.340                | 0.086                             | 0.851     |
| Cg   | 0.124           | -0.016          | 0.103           | 0.340                | 0.109                             | -0.212    |
| Cb   | 0.002           | 0.076           | 0.097           | 0.340                | 0.109                             | 0.206     |
| Ca   | -0.088          | 0.051           | -0.025          | 0.340                | 0.109                             | 0.255     |
| C1   | -0.163          | -0.086          | -0.019          | 0.340                | 0.086                             | 0.690     |
| O11  | -0.283          | -0.079          | 0.02            | 0.296                | 0.210                             | -0.774    |
| O12  | -0.097          | -0.186          | -0.050          | 0.296                | 0.210                             | -0.780    |
| N    | -0.197          | 0.156           | -0.029          | 0.325                | 0.170                             | -0.609    |
| O22  | 0.319           | -0.083          | -0.015          | 0.296                | 0.210                             | -0.894    |
| Hg1  | 0.093           | -0.120          | 0.104           | 0.265                | 0.016                             | 0.051     |
| Hg2  | 0.176           | 0.002           | 0.197           | 0.265                | 0.016                             | 0.037     |
| Hb1  | -0.058          | 0.065           | 0.188           | 0.265                | 0.016                             | -0.048    |
| Hb2  | 0.036           | 0.179           | 0.092           | 0.265                | 0.016                             | -0.025    |
| Ha   | -0.030          | 0.059           | -0.116          | 0.196                | 0.016                             | 0.024     |
| Hn1  | -0.280          | 0.104           | 0.009           | 0.107                | 0.016                             | 0.350     |
| Hn2  | -0.176          | 0.238           | 0.027           | 0.107                | 0.016                             | 0.355     |
| Hn3  | -0.219          | 0.186           | -0.123          | 0.107                | 0.016                             | 0.385     |

## S2 Densities, Dynamic Viscosities and Electrical Conductivities

Table S3: Molar concentrations,  $c$ , densities,  $\rho$ , dynamic viscosities,  $\eta$ , and electrical conductivities,  $\kappa$ , of the investigated aqueous sodium glutamate solutions at 25 °C.

| $c / \text{M}$ | $\rho / \text{g}\cdot\text{cm}^{-3}$ | $\eta / \text{mPa}\cdot\text{s}$ | $\kappa / \text{S}\cdot\text{m}^{-1}$ |
|----------------|--------------------------------------|----------------------------------|---------------------------------------|
| 0.101          | 1.005502                             | 0.9921                           | 0.571                                 |
| 0.206          | 1.014738                             | 1.1115                           | 1.087                                 |
| 0.406          | 1.031564                             | 1.2395                           | 1.885                                 |
| 0.601          | 1.047664                             | 1.397                            | 2.47                                  |
| 0.783          | 1.062868                             | 1.552                            | 2.93                                  |
| 0.965          | 1.074612                             | 1.556                            | 3.29                                  |
| 1.14           | 1.090961                             | 1.738                            | 3.563                                 |
| 1.30           | 1.103343                             | 1.943                            | 3.722                                 |
| 1.44           | 1.115383                             | 2.166                            | 3.847                                 |
| 1.60           | 1.128067                             | 2.454                            | 3.898                                 |
| 1.75           | 1.140130                             | 2.715                            | 3.88                                  |
| 1.90           | 1.150388                             | 3.058                            | 3.909                                 |

## S3 Dielectric Relaxation Spectroscopy

### S3.1 Relaxation time distribution functions

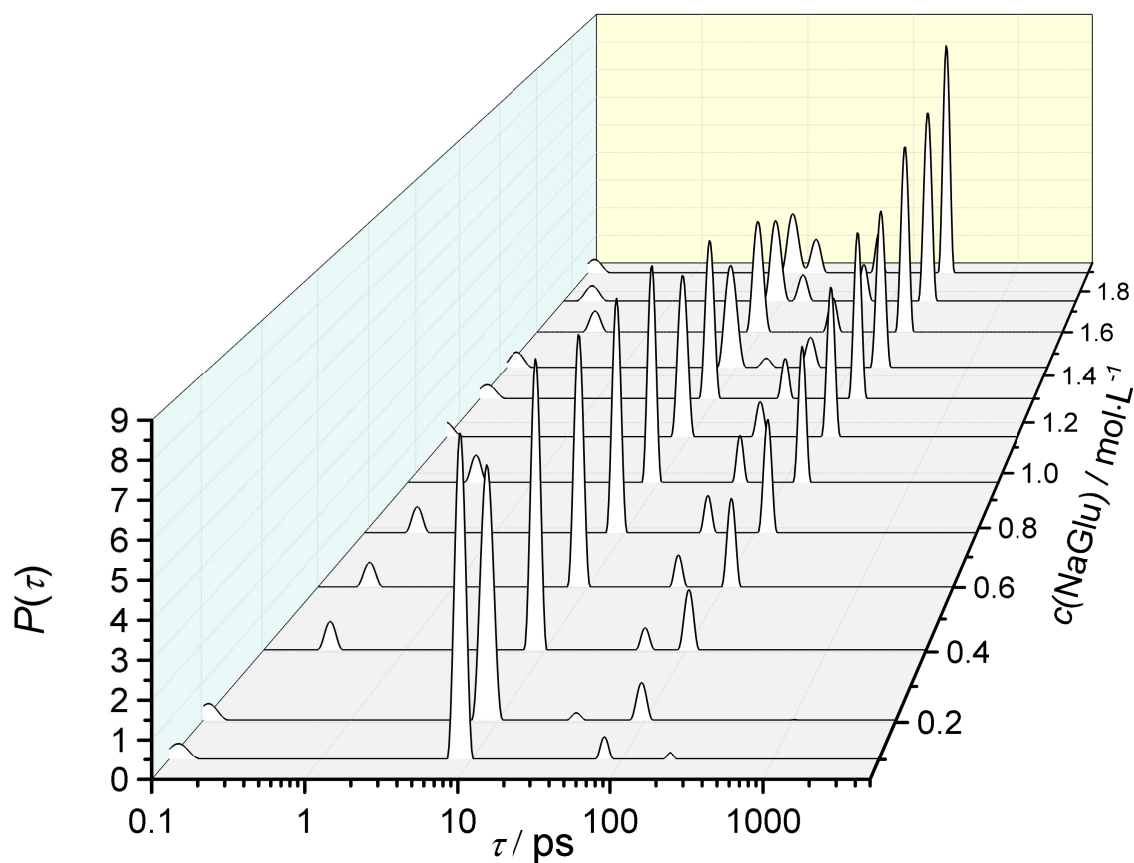

Figure S1: Relaxation-time distribution functions,  $P(\tau)$ , of the dielectric spectra of aqueous NaGlu solutions at 25 °C.<sup>4</sup>

### S3.2 Fit parameters of the dielectric spectra

Table S4: Static permittivity,  $\epsilon$ , relaxation amplitudes,  $S_j$ , and relaxation times,  $\tau_j$  of the resolved modes  $j = 1 \dots 3$ , and infinite-frequency permittivity,  $\epsilon_\infty$ , obtained from the D+D+D fit of dielectric spectra of NaGlu(aq) solutions of concentration  $c$  at 25 °C.<sup>a</sup>

| $c / \text{M}$ | $\epsilon$ | $S_1$ | $\tau_1 / \text{ps}$ | $S_2$ | $\tau_2 / \text{ps}$ | $S_3$ | $\tau_3 / \text{ps}$ | $\epsilon_\infty$ |
|----------------|------------|-------|----------------------|-------|----------------------|-------|----------------------|-------------------|
| 0.101          | 80.01      | 3.96  | 90F                  | 3.63  | 13.9                 | 66.73 | 8.14                 | 5.70              |
| 0.206          | 81.48      | 7.72  | 93.9                 | 3.89  | 17.6                 | 64.19 | 8.12                 | 5.68              |
| 0.406          | 85.18      | 14.37 | 98.1                 | 5.18  | 21.2                 | 59.50 | 8.13                 | 6.12              |
| 0.601          | 88.65      | 20.16 | 109                  | 7.20  | 24.0                 | 55.12 | 8.10                 | 6.17              |
| 0.783          | 92.08      | 25.52 | 121                  | 8.73  | 26.7                 | 51.45 | 8.16                 | 6.39              |
| 0.965          | 95.56      | 30.41 | 134                  | 10.48 | 29.8                 | 48.20 | 8.17                 | 6.47              |
| 1.14           | 98.46      | 36.41 | 144                  | 9.65  | 29.6                 | 45.71 | 8.38                 | 6.69              |
| 1.30           | 102.17     | 41.53 | 158                  | 11.43 | 29.2                 | 42.33 | 8.34                 | 6.87              |
| 1.44           | 106.66     | 45.96 | 176                  | 11.66 | 34.3                 | 41.12 | 8.64                 | 6.91              |
| 1.60           | 109.25     | 51.81 | 190                  | 12.70 | 32.5                 | 37.76 | 8.53                 | 6.98              |
| 1.75           | 113.46     | 56.74 | 212                  | 12.86 | 38.4                 | 36.73 | 8.83                 | 7.13              |
| 1.90           | 116.48     | 61.38 | 227                  | 12.81 | 40.1                 | 35.00 | 9.04                 | 7.30              |

<sup>a</sup> Parameter values followed by "F" were fixed during fitting.

### S3.3 Correction for kinetic depolarization

Ions moving in an applied electric field,  $\vec{E}$ , exert a torque on neighboring dipolar solvent molecules. This additional force opposes the reorienting force of the applied field, resulting in a depolarization of the bulk solvent molecules. Experimentally, this depolarization is expressed as a reduction of the apparent bulk solvent amplitude,  $S_{\text{H}_2\text{O}, \text{bulk}}$ , by a kinetic dielectric decrement,  $\Delta\epsilon_{\text{kd}}$ . Thus, the corrected equilibrium solvent amplitude,  $S_{\text{H}_2\text{O}, \text{bulk}}^{\text{eq}}$ , is given by

$$S_{\text{H}_2\text{O}, \text{bulk}}^{\text{eq}} = S_{\text{H}_2\text{O}, \text{bulk}} + \Delta\epsilon_{\text{kd}} \quad (1)$$

The continuum model of Hubbard and Onsager<sup>5-7</sup> (HO) is frequently used to correct experimental DRS data for this effect. In the HO approach the dielectric increment can be written as

$$\Delta\epsilon_{\text{kd}}^{\text{HO}} = p \cdot \frac{\epsilon(0) - \epsilon_{\infty}(0)}{\epsilon(0)} \cdot \frac{\tau(0)}{\epsilon_0} \cdot \kappa \quad (2)$$

where  $\epsilon_0$  is the permittivity of free space,  $\epsilon(0)$  and  $\epsilon_{\infty}(0)$  are the static and infinite-frequency permittivities of the neat solvent,  $\tau(0)$  is the relaxation time of the solvent dispersion step,  $\kappa$  is the solution electrical conductivity, and  $p$  is a hydrodynamic parameter which describes the coupling of translational ion motions to the macroscopic viscosity. For  $p = 1$ , so-called *stick*, and for  $p = 2/3$  *slip* boundary conditions apply. Generally, *slip* conditions are considered more physically realistic<sup>8,9</sup> and so were chosen for further analysis. The HO theory is valid only at infinite dilution of the electrolyte and thus its application to concentrated solutions is problematic. Recently, Segal *et al.* introduced a modification of the HO equation to account for finite salt concentrations<sup>10</sup>

$$\Delta\epsilon_{\text{kd}}^{\text{Segal}} = \Delta\epsilon_{\text{kd}}^{\text{HO}} \cdot \exp(\sigma R) \cdot (\sigma R + 2)/2 \quad (3)$$

where  $\sigma$  is the reciprocal Debye length and  $R$  is the effective ion radius. Whereas  $\sigma$  can be calculated readily, the determination of  $R$  is not straightforward. In this work, the mean radius of anion and cation was used for  $R$ , with the value for  $\text{Na}^+$  taken from Marcus<sup>11</sup> while for  $\text{Glu}^-$  the equivalent sphere radius from DFT calculations was taken (Gaussian 09 at the B3LYP/6-31++G(d,p) level with the PCM solvation model).<sup>1</sup>

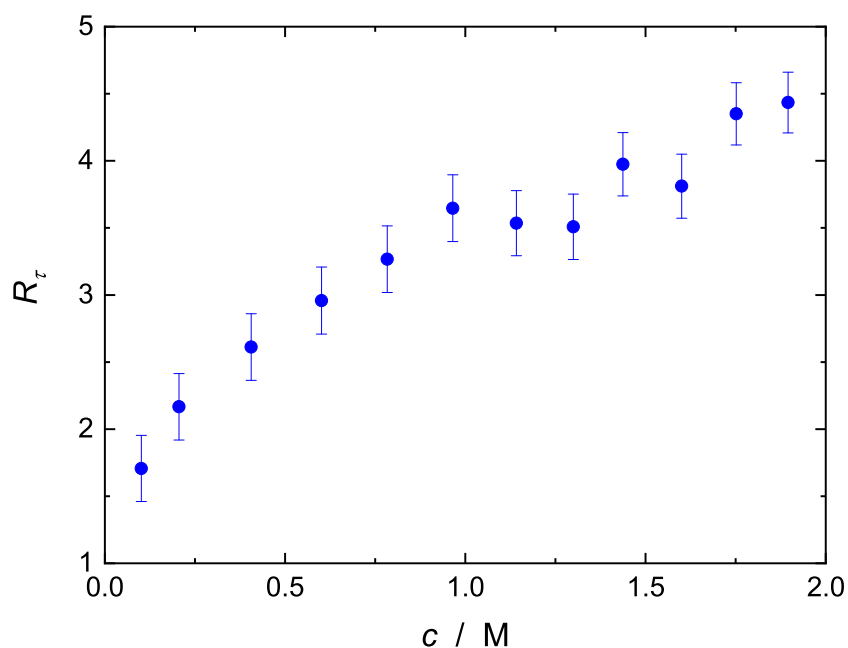

Figure S2: Slow-water retardation factor,  $R_\tau = \tau_3/\tau_2$  (●), of aqueous NaGlu solutions as function of solute concentration,  $c$ .

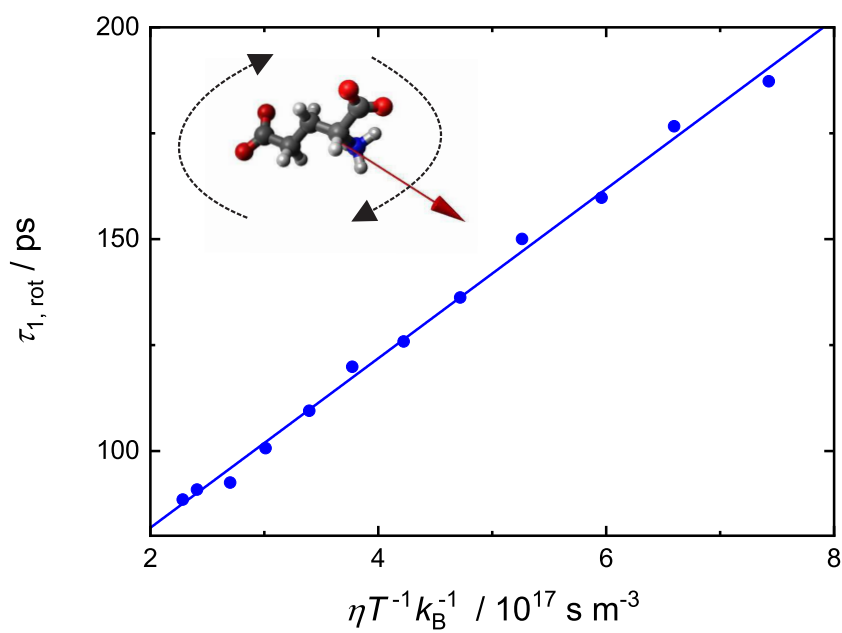

Figure S3: Rotational correlation time of the  $\text{Glu}^-$  anion,  $\tau_{1,\text{rot}}$  (●), as a function of  $\eta T^{-1} k_B^{-1}$ . The line denotes the Stokes-Einstein-Debye fit; the red arrow of the inset indicates the direction of the  $\text{Glu}^-$  dipole moment.

## S4 Quantum-chemical calculations of $\text{Glu}^-$ hydrates

The minimum-energy geometries and the respective dipole moments shown in Fig. S4 were obtained by calculations with Gaussian 09<sup>1</sup> at the B3LYP/6-31++G(d,p) level with the PCM solvation model (using the center of mass for the pivot).

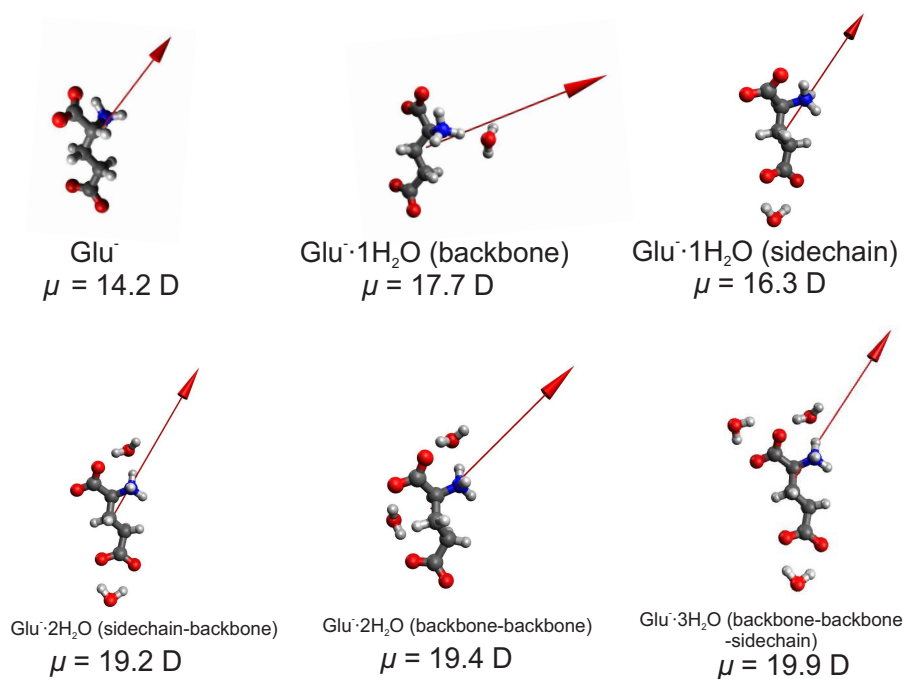

Figure S4: Structures of  $\text{Glu}^-$  and its hydrates obtained from DFT calculations. The arrows indicate the dipole moments of the aggregates. Blue: nitrogen, red: oxygen, dark-gray: carbon, light-gray: hydrogen.



## S5 RISM results

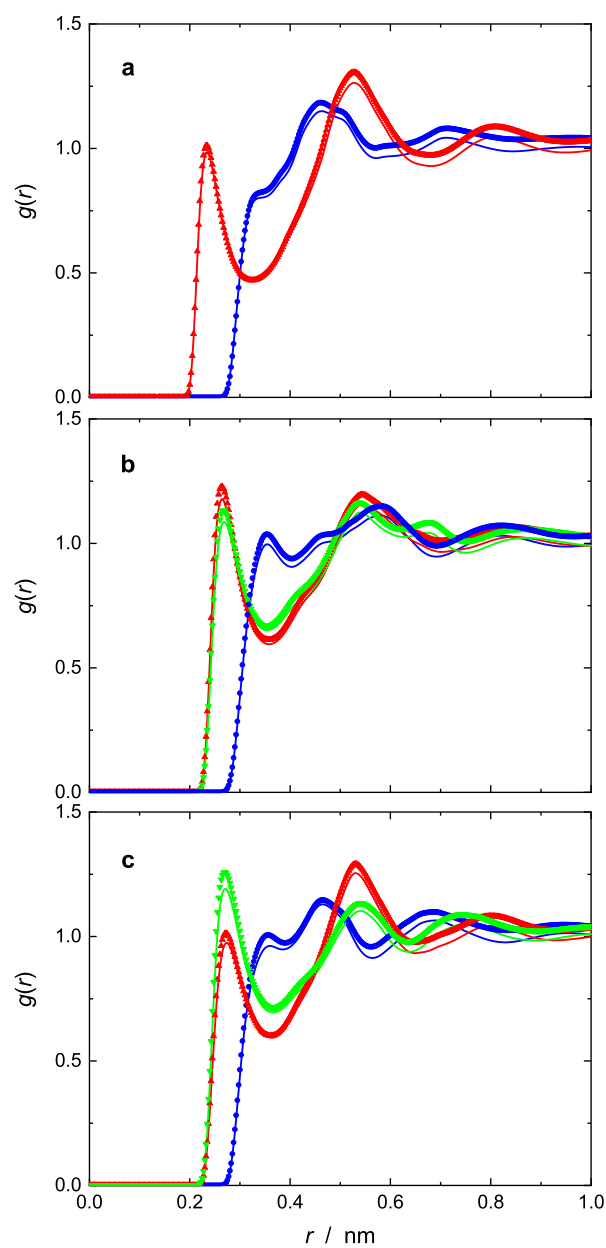

Figure S5: Radial distribution functions characterizing the hydration of the hydrophobic moiety of  $\text{Glu}^-$ : (a)  $g_{\text{C}\alpha\text{-Ow}}(r)$  (blue) and  $g_{\text{H}\alpha\text{-Hw}}(r)$  (red); (b)  $g_{\text{C}\beta\text{-Ow}}(r)$  (blue),  $g_{\text{H}\beta 1\text{-Ow}}(r)$  (red) and  $g_{\text{H}\beta 2\text{-Ow}}(r)$  (green); (c)  $g_{\text{C}\gamma\text{-Ow}}(r)$  (blue),  $g_{\text{H}\gamma 1\text{-Ow}}(r)$  (red) and  $g_{\text{H}\gamma 2\text{-Ow}}(r)$  (green). Lines show data for infinite dilution and symbols those for  $c = 1.90 \text{ M}$ .

Table S5: Values,  $g_{i-j}(r_{M1})$ , of the first maximum and its location,  $r_{M1}$  (brackets, in nm), of 1D-RISM site  $i$ -site  $j$  RDFs and associated coordination numbers,  $n$ , for NaGlu(aq) at “infinite dilution” ( $c \rightarrow 0$ ) and at  $c = 1.90$  M.

| sites $i-j$                            | $g_{i-j}(r_{M1})$ |              | CN                |        |
|----------------------------------------|-------------------|--------------|-------------------|--------|
|                                        | $c \rightarrow 0$ | 1.90 M       | $c \rightarrow 0$ | 1.90 M |
| ammonium group hydration               |                   |              |                   |        |
| N-Ow                                   | 2.09 (0.290)      | 2.15 (0.290) | 5.32              | 4.6    |
| N-Hw                                   | 1.24 (0.358)      | 1.29 (0.352) | –                 | –      |
| Hn1-Ow                                 | 0.45 (0.188)      | 0.45 (0.188) | 0.3               | 0.25   |
| Hn2-Ow                                 | 1.20 (0.180)      | 1.21 (0.180) | 0.91              | 0.78   |
| Hn3-Ow                                 | 1.42 (0.177)      | 1.42 (0.177) | 0.99              | 0.85   |
| backbone carboxylate group hydration   |                   |              |                   |        |
| O11-Ow                                 | 1.91 (0.295)      | 1.94 (0.295) | 6.33              | 5.45   |
| O11-Hw                                 | 2.35 (0.170)      | 2.36 (0.170) | 2.46              | 2.06   |
| O12-Ow                                 | 1.93 (0.292)      | 1.96 (0.292) | 6.02              | 5.16   |
| O12-Hw                                 | 2.58 (0.170)      | 2.57 (0.170) | 2.65              | 2.19   |
| side-chain carboxylate group hydration |                   |              |                   |        |
| O21-Ow                                 | 1.92 (0.292)      | 1.94 (0.292) | 5.91              | 5.04   |
| O21-Hw                                 | 2.95 (0.168)      | 2.96 (0.168) | 2.97              | 2.46   |
| O22-Ow                                 | 2.06 (0.295)      | 2.08 (0.295) | 6.77              | 5.77   |
| O22-Hw                                 | 3.30 (0.168)      | 3.27 (0.168) | 3.34              | 2.71   |
| hydration of hydrophobic groups        |                   |              |                   |        |
| C $\alpha$ -Ow                         | 1.15 (0.463)      | 1.18 (0.463) | 22.72             | 19.21  |
| H $\alpha$ -Ow                         | 0.99 (0.235)      | 1.01 (0.235) | 2.28              | 1.92   |
| C $\beta$ -Ow                          | 1.00 (0.355)      | 1.04 (0.355) | 4.86              | 4.2    |
| H $\beta$ 1-Ow                         | 1.18 (0.265)      | 1.23 (0.263) | 3.67              | 3.17   |
| H $\beta$ 2-Ow                         | 1.09 (0.267)      | 1.13 (0.267) | 3.56              | 2.99   |
| C $\gamma$ -Ow                         | 0.96 (0.360)      | 1.01 (0.358) | 3.83              | 3.59   |
| H $\gamma$ 1-Ow                        | 0.97 (0.273)      | 1.01 (0.273) | 3.49              | 2.98   |
| H $\gamma$ 2-Ow                        | 1.19 (0.270)      | 1.26 (0.270) | 4.31              | 3.75   |
| Na <sup>+</sup> hydration              |                   |              |                   |        |
| Na-Ow                                  | 3.83 (0.235)      | 3.73 (0.235) | 4.81              | 4.00   |
| Na <sup>+</sup> binding                |                   |              |                   |        |
| O11-Na                                 | 6.61 (0.230)      | 4.80 (0.230) |                   | 0.22   |
| O12-Na                                 | 8.52 (0.230)      | 5.59 (0.230) |                   | 0.27   |
| O21-Na                                 | 8.57 (0.227)      | 6.17 (0.227) |                   | 0.29   |
| O22-Na                                 | 11.42 (0.227)     | 7.66 (0.227) |                   | 0.41   |

## References

- [1] M. J. Frisch, G. W. Trucks, H. B. Schlegel, G. E. Scuseria, M. A. Robb, J. R. Cheeseman, G. Scalmani, V. Barone, B. Mennucci, G. A. Petersson, H. Nakatsuji, M. Caricato, X. Li, H. P. Hratchian, A. F. Izmaylov, J. Bloino, G. Zheng, J. L. Sonnenberg, M. Hada, M. Ehara, K. Toyota, R. Fukuda, J. Hasegawa, M. Ishida, T. Nakajima, Y. Honda, O. Kitao, H. Nakai, T. Vreven, J. A. Montgomery, Jr., J. E. Peralta, F. Ogliaro, M. Bearpark, J. J. Heyd, E. Brothers, K. N. Kudin, V. N. Staroverov, R. Kobayashi, J. Normand, K. Raghavachari, A. Rendell, J. C. Burant, S. S. Iyengar, J. Tomasi, M. Cossi, N. Rega, J. M. Millam, M. Klene, J. E. Knox, J. B. Cross, V. Bakken, C. Adamo, J. Jaramillo, R. Gomperts, R. E. Stratmann, O. Yazyev, A. J. Austin, R. Cammi, C. Pomelli, J. W. Ochterski, R. L. Martin, K. Morokuma, V. G. Zakrzewski, G. A. Voth, P. Salvador, J. J. Dannenberg, S. Dapprich, A. D. Daniels, O. Farkas, J. B. Foresman, J. V. Ortiz, J. Cioslowski and D. J. Fox, *Gaussian 09 Revision E.01*, 2010, Gaussian Inc. Wallingford CT 2009.
- [2] S. E. McLain, A. K. Soper and A. Watts, *J. Phys. Chem. B*, 2006, **110**, 21251–21258.
- [3] C. D. Daub, K. Leung and A. Luzar, *J. Phys. Chem. B*, 2009, **113**, 7687–7700.
- [4] A. Y. Zaslavsky and R. Buchner, *J. Phys.: Condens. Matter*, 2011, **23**, 025903.
- [5] J. Hubbard and L. Onsager, *J. Chem. Phys.*, 1977, **67**, 4850–4857.
- [6] J. B. Hubbard, *J. Chem. Phys.*, 1978, **68**, 1649–1664.
- [7] J. B. Hubbard, P. Colonomos and P. G. Wolynes, *J. Chem. Phys.*, 1979, **71**, 2652–2661.
- [8] R. Buchner, T. Chen and G. Heftner, *J. Phys. Chem. B*, 2004, **108**, 2365–2375.
- [9] S. Schrödle, W. W. Rudolph, G. Heftner and R. Buchner, *Geochim. Cosmochim. Acta*, 2007, **71**, 5287–5300.
- [10] M. Sega, S. Kantorovich and A. Arnold, *Phys. Chem. Chem. Phys.*, 2015, **17**, 130–133.
- [11] Y. Marcus, *Ion Properties*, CRC Press, Boca Raton, 1997.
